# Supplementary material
Source: PubMed Central journal article supplement (PMC3187046)
Supplement: supp_10_9_1241__3.pdf [file supp_10_9_1241__3.pdf]

## Supplemental Table 1

- 1.- Sensitivity to the indicated drugs ranges from 1 (highly sensitive) to 10 (highly tolerant). Wild type has a score of 6.
- 2.- Growth at 1 mM K<sup>+</sup> is calculated as the ratio of growth at 1 mM /growth at 50 mM K<sup>+</sup>. Wild type has a score of about 70%.

| ORF#      | Name            | HYGROM | SPERMINE | TMA | Growth 1 mM K <sup>+</sup> |
|-----------|-----------------|--------|----------|-----|----------------------------|
| YAL011W   | SWC3            | 5      | 5        | 4   | 54.4                       |
| YBL006C   | LDB7            | 5      | 5        | 4   | 38.9                       |
| YBL024W   | NCL1            | 9      | 10       | 9   | 59.5                       |
| YBL058W   | SHP1            | 1      | 2        | 1   | 6.6                        |
| YBR081C   | SPT7            | 1      | 2        | 3   | 52.5                       |
| YBR097W   | VPS15           | 3      | 1        | 5   | 21.6                       |
| YBR101C   | FES1            | 9      | 9        | 8   | 34.4                       |
| YBR112C   | CYC8            | 5      | 5        | 5   | 36.1                       |
| YBR164C   | ARL1            | 3      | 1        | 4   | 35.7                       |
| YBR200W   | BEM1            | 4      | 2        | 4   | 43.7                       |
| YBR231C   | SWC5            | 5      | 5        | 4   | 52.5                       |
| YBR255W   | MTC4            | 4      | 2.5      | 4   | 57.5                       |
| YBR279W   | PAF1            | 3      | 5        | 4   | 54.8                       |
| YCL010C   | SGF29           | 5      | 5        | 5   | 43.9                       |
| YCR008W   | SAT4            | 3      | 2.5      | 3   | 56.3                       |
| YCR020W-B | HTL1            | 3      | 5        | 4   | 55.5                       |
| YCR084C   | TUP1            | 1      | 2        | 1   | 38.4                       |
| YCR088W   | ABP1            | 8.5    | 8        | 7   | 57.1                       |
| YDL005C   | MED2            | 1      | 4        | 3   | 16.9                       |
| YDL006W   | PTC1            | 1      | 3        | 4   | 57.0                       |
| YDL025C   | RTK1            | 8      | 7        | 8   | 47.9                       |
| YDL047W   | SIT4            | 4      | 2.5      | 4   | 49.3                       |
| YDL052C   | SLC1            | 4      | 5        | 4   | 37.3                       |
| YDL075W   | RPL31A          | 2      | 2.5      | 5   | 54.1                       |
| YDL077C   | VAM6            | 5      | 5        | 5   | 22.0                       |
| YDL090C   | RAM1            | 4      | 2.5      | 5   | 61.1                       |
| YDL113C   | ATG20           | 3.5    | 5        | 3   | 46.4                       |
| YDL118W   | Uncharacterized | 5      | 5        | 4   | 14.7                       |
| YDL160C   | DHH1            | 2      | 1        | 4   | 57.2                       |
| YDL172C   | ORF, Dubious    | 9      | 7        | 7   | 28.3                       |
| YDL173W   | PAR32           | 9      | 9        | 9   | 31.1                       |
| YDL192W   | ARF1            | 1      | 2        | 4   | 45.6                       |
| YDL226C   | GCS1            | 1      | 1        | 4   | 56.5                       |
| YDR017C   | KCS1            | 1      | 1        | 3   | 21.9                       |
| YDR027C   | VPS54           | 1      | 1        | 3   | 57.1                       |
| YDR028C   | REG1            | 1      | 1        | 3   | 30.9                       |
| YDR080W   | VPS41           | 3      | 2        | 4   | 32.1                       |
| YDR099W   | BMH2            | 5      | 5        | 5   | 58.9                       |
| YDR108W   | GSG1            | 4      | 3        | 5   | 51.0                       |
| YDR136C   | VPS61           | 3      | 1        | 1   | 46.9                       |
| YDR137W   | RGP1            | 2.5    | 1        | 3   | 46.2                       |
| YDR138W   | HPR1            | 4      | 5        | 4   | 51.3                       |
| YDR176W   | NGG1            | 2      | 3        | 4   | 47.1                       |

|           |                        |     |     |     |      |
|-----------|------------------------|-----|-----|-----|------|
| YDR195W   | <i>REF2</i>            | 1   | 4   | 4   | 43.4 |
| YDR226W   | <i>ADK1</i>            | 1   | 2   | 3   | 59.2 |
| YDR245W   | <i>MNN10</i>           | 1   | 3   | 3   | 47.0 |
| YDR264C   | <i>AKR1</i>            | 1   | 2   | 1   | 17.6 |
| YDR297W   | <i>SUR2</i>            | 8   | 8   | 8   | 47.7 |
| YDR323C   | <i>PEP7</i>            | 1   | 4   | 4   | 49.4 |
| YDR364C   | <i>CDC40</i>           | 1   | 2   | 4   | 43.8 |
| YDR369C   | <i>XRS2</i>            | 4   | 5   | 5   | 50.6 |
| YDR417C   | <i>ORF, Dubious</i>    | 4   | 5   | 4   | 21.3 |
| YDR432W   | <i>NPL3</i>            | 2   | 3   | 4   | 57.7 |
| YDR448W   | <i>ADA2</i>            | 2   | 3   | 4   | 45.2 |
| YDR456W   | <i>NHX1</i>            | 1   | 4   | 5   | 65.5 |
| YDR474C   | <i>Gene name JIP4</i>  | 5   | 4   | 5   | 55.7 |
| YDR475C   | <i>e SGD annotated</i> | 5   | 4   | 5   | 58.1 |
| YDR484W   | <i>VPS52</i>           | 1   | 4   | 4   | 58.1 |
| YDR485C   | <i>VPS72</i>           | 5   | 5   | 4   | 57.1 |
| YDR532C   | <i>Uncharacterized</i> | 3   | 4   | 3   | 16.8 |
| YER014C-A | <i>BUD25</i>           | 1   | 1   | 1   | 66.0 |
| YER017C   | <i>AFG3</i>            | 1   | 3   | 3   | 3.0  |
| YER070W   | <i>RNR1</i>            | 2   | 5   | 4   | 24.4 |
| YER177W   | <i>BMH1</i>            | 5   | 1   | 4   | 58.2 |
| YFR040W   | <i>SAP155</i>          | 2   | 1   | 3   | 58.8 |
| YGL005C   | <i>COG7</i>            | 5   | 4   | 3   | 51.6 |
| YGL007W   | <i>BRP1</i>            | 9   | 10  | 10  | 2.2  |
| YGL014W   | <i>PUF4</i>            | 8   | 8   | 8   | 50.5 |
| YGL043W   | <i>DST1</i>            | 3   | 3   | 4   | 45.6 |
| YGL054C   | <i>ERV14</i>           | 3   | 3   | 3   | 51.5 |
| YGL070C   | <i>RPB9</i>            | 1   | 5   | 3   | 40.9 |
| YGL127C   | <i>SOH1</i>            | 5   | 4.5 | 5   | 31.3 |
| YGL212W   | <i>VAM7</i>            | 3   | 4   | 5   | 2.6  |
| YGL218W   | <i>ORF, Dubious</i>    | 1   | 2   | 1   | 27.4 |
| YGL219C   | <i>MDM34</i>           | 5   | 5   | 3   | 63.1 |
| YGL244W   | <i>RTF1</i>            | 3   | 5   | 4   | 42.7 |
| YGR036C   | <i>CAX4</i>            | 1   | 2   | 1   | 43.6 |
| YGR056W   | <i>RSC1</i>            | 3.5 | 3   | 3   | 35.1 |
| YGR057C   | <i>LST7</i>            | 3   | 4   | 4   | 13.8 |
| YGR104C   | <i>SRB5</i>            | 4   | 2   | 2   | 16.1 |
| YGR166W   | <i>KRE11</i>           | 3   | 5   | 4   | 57.5 |
| YGR192C   | <i>TDH3</i>            | 7   | 8   | 8   | 63.0 |
| YGR237C   | <i>Uncharacterized</i> | 3   | 3   | 2   | 60.9 |
| YGR252W   | <i>GCN5</i>            | 3   | 2   | 3.5 | 56.0 |
| YHL031C   | <i>GOS1</i>            | 5   | 4   | 5   | 50.4 |
| YHR012W   | <i>VPS29</i>           | 3   | 4   | 5   | 44.2 |
| YHR060W   | <i>VMA22</i>           | 2   | 4   | 5   | 24.0 |
| YHR191C   | <i>CTF8</i>            | 3   | 5   | 2   | 55.1 |
| YIL009C-A | <i>EST3</i>            | 5   | 5   | 5   | 57.1 |
| YIL040W   | <i>APQ12</i>           | 5   | 5   | 3   | 56.2 |
| YIR026C   | <i>YVH1</i>            | 3   | 3   | 2   | 56.0 |
| YJL003W   | <i>COX16</i>           | 2   | 5   | 3   | 53.4 |
| YJL004C   | <i>SYS1</i>            | 2   | 5   | 3   | 35.4 |

|         |                     |   |     |     |      |
|---------|---------------------|---|-----|-----|------|
| YJL006C | <i>CTK2</i>         | 1 | 1   | 1   | 7.8  |
| YJL036W | <i>SNX4</i>         | 5 | 3   | 5   | 45.1 |
| YJL053W | <i>PEP8</i>         | 4 | 5   | 5   | 49.6 |
| YJL080C | <i>SCP160</i>       | 3 | 4   | 5   | 26.0 |
| YJL098W | <i>SAP185</i>       | 7 | 9   | 7   | 69.4 |
| YJL115W | <i>ASF1</i>         | 3 | 2   | 4   | 32.6 |
| YJL117W | <i>PHO86</i>        | 2 | 1   | 3   | 57.3 |
| YJL124C | <i>LSM1</i>         | 4 | 2   | 5   | 26.2 |
| YJL129C | <i>TRK1</i>         | 1 | 1   | 4   | 4.7  |
| YJL140W | <i>RPB4</i>         | 1 | 3   | 1.5 | 42.0 |
| YJL154C | <i>VPS35</i>        | 3 | 5   | 5   | 57.9 |
| YJL165C | <i>HAL5</i>         | 1 | 1   | 1.5 | 60.0 |
| YJL175W | <i>ORF, Dubious</i> | 5 | 2   | 3   | 57.6 |
| YJL176C | <i>SWI3</i>         | 2 | 1.5 | 3   | 34.4 |
| YJL184W | <i>GON7</i>         | 1 | 1   | 2   | 46.0 |
| YJL189W | <i>RPL39</i>        | 1 | 3   | 2   | 53.9 |
| YJL204C | <i>RCY1</i>         | 2 | 3   | 3   | 33.1 |
| YJR018W | <i>Dubious</i>      | 1 | 1   | 1   | 31.5 |
| YJR059W | <i>PTK2</i>         | 8 | 10  | 10  | 32.1 |
| YJR118C | <i>ILM1</i>         | 3 | 5   | 3   | 42.0 |
| YKL009W | <i>MRT4</i>         | 3 | 3   | 5   | 35.5 |
| YKL054C | <i>DEF1</i>         | 1 | 2   | 2   | 41.1 |
| YKL055C | <i>OAR1</i>         | 5 | 5   | 5   | 21.7 |
| YKL119C | <i>VPH2</i>         | 3 | 5   | 3   | 14.5 |
| YKR001C | <i>VPS1</i>         | 1 | 4   | 2   | 42.7 |
| YKR007W | <i>MEH1</i>         | 3 | 2   | 5   | 31.5 |
| YKR020W | <i>VPS51</i>        | 1 | 4   | 4   | 72.2 |
| YKR024C | <i>DBP7</i>         | 5 | 7   | 5   | 37.6 |
| YLR039C | <i>RIC1</i>         | 3 | 3   | 1   | 60.7 |
| YLR048W | <i>RPS0B</i>        | 2 | 2   | 2   | 33.0 |
| YLR056W | <i>ERG3</i>         | 2 | 3   | 4   | 50.8 |
| YLR061W | <i>RPL22A</i>       | 4 | 3   | 5   | 4.1  |
| YLR085C | <i>ARP6</i>         | 5 | 5   | 4   | 47.8 |
| YLR087C | <i>CSF1</i>         | 2 | 3   | 4   | 29.8 |
| YLR148W | <i>PEP3</i>         | 1 | 1   | 1   | 38.4 |
| YLR182W | <i>SWI6</i>         | 3 | 3   | 4   | 5.0  |
| YLR200W | <i>YKE2</i>         | 4 | 3   | 4   | 35.6 |
| YLR233C | <i>EST1</i>         | 5 | 5   | 5   | 42.9 |
| YLR240W | <i>VPS34</i>        | 1 | 1   | 1   | 47.1 |
| YLR242C | <i>ARV1</i>         | 1 | 4   | 3   | 52.1 |
| YLR248W | <i>RCK2</i>         | 1 | 1   | 1   | 27.9 |
| YLR261C | <i>VPS63</i>        | 2 | 3.5 | 1   | 43.4 |
| YLR262C | <i>YPT6</i>         | 2 | 3.5 | 1   | 53.7 |
| YLR263W | <i>RED1</i>         | 5 | 4   | 5   | 35.9 |
| YLR268W | <i>SEC22</i>        | 3 | 5   | 4   | 71.5 |
| YLR273C | <i>PIG1</i>         | 5 | 4   | 5   | 33.7 |
| YLR318W | <i>EST2</i>         | 5 | 5   | 5   | 63.3 |
| YLR322W | <i>VPS65</i>        | 1 | 2   | 4   | 52.8 |
| YLR350W | <i>ORM2</i>         | 4 | 4   | 5   | 28.4 |
| YLR357W | <i>RSC2</i>         | 3 | 4   | 2   | 56.0 |

|           |                        |     |     |     |      |
|-----------|------------------------|-----|-----|-----|------|
| YLR373C   | <i>VID22</i>           | 1   | 1   | 3   | 63.4 |
| YLR374C   | <i>Dubious</i>         | 4   | 3   | 4.5 | 65.2 |
| YLR382C   | <i>NAM2</i>            | 4   | 4   | 4   | 57.6 |
| YLR399C   | <i>BDF1</i>            | 1   | 2   | 2   | 46.3 |
| YLR447C   | <i>VMA6</i>            | 7   | 10  | 7   | 12.5 |
| YML006C   | <i>GIS4</i>            | 5   | 2   | 5   | 61.7 |
| YML008C   | <i>ERG6</i>            | 1   | 1   | 1   | 7.0  |
| YML016C   | <i>PPZ1</i>            | 7   | 7   | 7   | 62.8 |
| YML041C   | <i>VPS71</i>           | 5   | 5   | 4   | 56.3 |
| YML061C   | <i>PIF1</i>            | 4   | 5   | 4   | 48.6 |
| YML071C   | <i>COG8</i>            | 2   | 5   | 5   | 56.1 |
| YMR015C   | <i>ERG5</i>            | 5   | 2   | 4   | 51.2 |
| YMR031W-A | <i>Dubious</i>         | 5   | 5   | 4   | 65.5 |
| YMR078C   | <i>CTF18</i>           | 5   | 5   | 4   | 59.9 |
| YMR091C   | <i>NPL6</i>            | 1   | 1.5 | 2   | 65.0 |
| YMR102C   | <i>Uncharacterized</i> | 8   | 8   | 7   | 60.7 |
| YMR109W   | <i>MYO5</i>            | 8   | 7   | 8   | 60.5 |
| YMR202W   | <i>ERG2</i>            | 1   | 1   | 1   | 28.3 |
| YMR216C   | <i>SKY1</i>            | 8   | 10  | 10  | 22.3 |
| YMR223W   | <i>UBP8</i>            | 8   | 9   | 7   | 64.3 |
| YMR224C   | <i>MRE11</i>           | 3.5 | 3   | 5   | 71.0 |
| YMR231W   | <i>PEP5</i>            | 1   | 1   | 1   | 15.0 |
| YNL041C   | <i>COG6</i>            | 3   | 4   | 5   | 67.7 |
| YNL051W   | <i>COG5</i>            | 5   | 4   | 5   | 62.8 |
| YNL064C   | <i>YDJ1</i>            | 1   | 2   | 2   | 20.9 |
| YNL105W   | <i>ORF, Dubious</i>    | 8   | 8   | 7   | 57.8 |
| YNL106C   | <i>INP52</i>           | 8   | 8   | 7   | 55.5 |
| YNL107W   | <i>YAF9</i>            | 3   | 2   | 4   | 42.5 |
| YNL133C   | <i>FYV6</i>            | 1   | 1   | 1   | 38.6 |
| YNL145W   | <i>MFA2</i>            | 5   | 5   | 5   | 31.9 |
| YNL162W   | <i>RPL42A</i>          | 3   | 3   | 4   | 66.7 |
| YNL197C   | <i>WHI3</i>            | 2   | 2   | 3   | 65.4 |
| YNL206C   | <i>RTT106</i>          | 4   | 4   | 4   | 48.5 |
| YNL248C   | <i>RPA49</i>           | 3   | 2   | 3   | 38.4 |
| YNL250W   | <i>RAD50</i>           | 4   | 5   | 5   | 51.3 |
| YNL255C   | <i>GIS2</i>            | 4   | 2   | 4   | 64.7 |
| YNL296W   | <i>Dubious</i>         | 4   | 5   | 4   | 35.2 |
| YNR010W   | <i>CSE2</i>            | 3   | 2   | 4   | 67.9 |
| YNR037C   | <i>RSM19</i>           | 3   | 3   | 4   | 45.7 |
| YOL012C   | <i>HTZ1</i>            | 4   | 4   | 4   | 56.8 |
| YOL018C   | <i>TLG2</i>            | 1   | 2   | 2   | 69.4 |
| YOL072W   | <i>THP1</i>            | 1   | 4.5 | 4   | 35.2 |
| YOL081W   | <i>IRA2</i>            | 2   | 4   | 3   | 14.4 |
| YOL087C   | <i>Uncharacterized</i> | 3   | 4   | 4   | 31.7 |
| YOL115W   | <i>PAP2</i>            | 1   | 2   | 3   | 63.8 |
| YOL148C   | <i>SPT20</i>           | 2   | 2   | 1   | 53.4 |
| YOR014W   | <i>RTS1</i>            | 3   | 2   | 3   | 66.1 |
| YOR036W   | <i>PEP12</i>           | 1   | 3   | 4   | 50.5 |
| YOR080W   | <i>DIA2</i>            | 2.5 | 2.5 | 4   | 39.8 |
| YOR085W   | <i>OST3</i>            | 1   | 4   | 5   | 66.6 |

|         |                        |     |     |     |      |
|---------|------------------------|-----|-----|-----|------|
| YOR089C | <i>VPS21</i>           | 4   | 5   | 5   | 65.0 |
| YOR106W | <i>VAM3</i>            | 4   | 4   | 4   | 4.5  |
| YOR198C | <i>BFR1</i>            | 4   | 3   | 4   | 45.6 |
| YOR209C | <i>NPT1</i>            | 3.5 | 2.5 | 5   | 35.3 |
| YOR216C | <i>RUD3</i>            | 3   | 5   | 5   | 60.0 |
| YOR267C | <i>HRK1</i>            | 7   | 8   | 7   | 53.0 |
| YOR270C | <i>VPH1</i>            | 3   | 2   | 4   | 33.1 |
| YOR306C | <i>MCH5</i>            | 4   | 2.5 | 4   | 30.4 |
| YOR327C | <i>SNC2</i>            | 2   | 2   | 2   | 63.1 |
| YOR332W | <i>VMA4</i>            | 5   | 5   | 5   | 53.8 |
| YOR334W | <i>MRS2</i>            | 5.5 | 5   | 2   | 40.1 |
| YPL031C | <i>PHO85</i>           | 1   | 1   | 1   | 39.8 |
| YPL042C | <i>SSN3</i>            | 3   | 2.5 | 4   | 64.3 |
| YPL045W | <i>VPS16</i>           | 1   | 1   | 1   | 18.7 |
| YPL047W | <i>SGF11</i>           | 8   | 9   | 7   | 64.1 |
| YPL097W | <i>MSY1</i>            | 3   | 5   | 5.5 | 44.2 |
| YPL106C | <i>SSE1</i>            | 3   | 2   | 2   | 33.2 |
| YPL129W | <i>TAF14</i>           | 2   | 2   | 2   | 68.1 |
| YPL182C | <i>Dubious</i>         | 8   | 9   | 8   | 64.6 |
| YPL213W | <i>LEA1</i>            | 2   | 3   | 4.5 | 44.9 |
| YPL254W | <i>HFI1</i>            | 8   | 8   | 7   | 69.3 |
| YPL260W | <i>Uncharacterized</i> | 4   | 3   | 4   | 67.2 |
| YPL261C | <i>Dubious</i>         | 4   | 3   | 4   | 67.5 |
| YPR060C | <i>ARO7</i>            | 1   | 1   | 1   | 42.6 |
| YPR070W | <i>MED1</i>            | 4.5 | 5   | 4   | 55.4 |
| YPR099C | <i>Dubious</i>         | 1   | 2   | 2   | 19.6 |
| YPR100W | <i>MRPL51</i>          | 4.5 | 5   | 4   | 54.3 |
| YPR101W | <i>SNT309</i>          | 4.5 | 3.5 | 5.5 | 39.3 |
| YPR135W | <i>CTF4</i>            | 4   | 3   | 4   | 18.9 |
| YPR139C | <i>VPS66</i>           | 1   | 2   | 3   | 21.3 |
| YPR153W | <i>ORF, Verified</i>   | 1   | 1   | 2   | 36.8 |
| YPR163C | <i>TIF3</i>            | 2   | 4   | 3   | 46.1 |
| YPR194C | <i>OPT2</i>            | 4   | 3   | 5   | 33.4 |
