# Supplementary material
Source: PubMed Central journal article supplement (PMC3187046)

### A) Group A

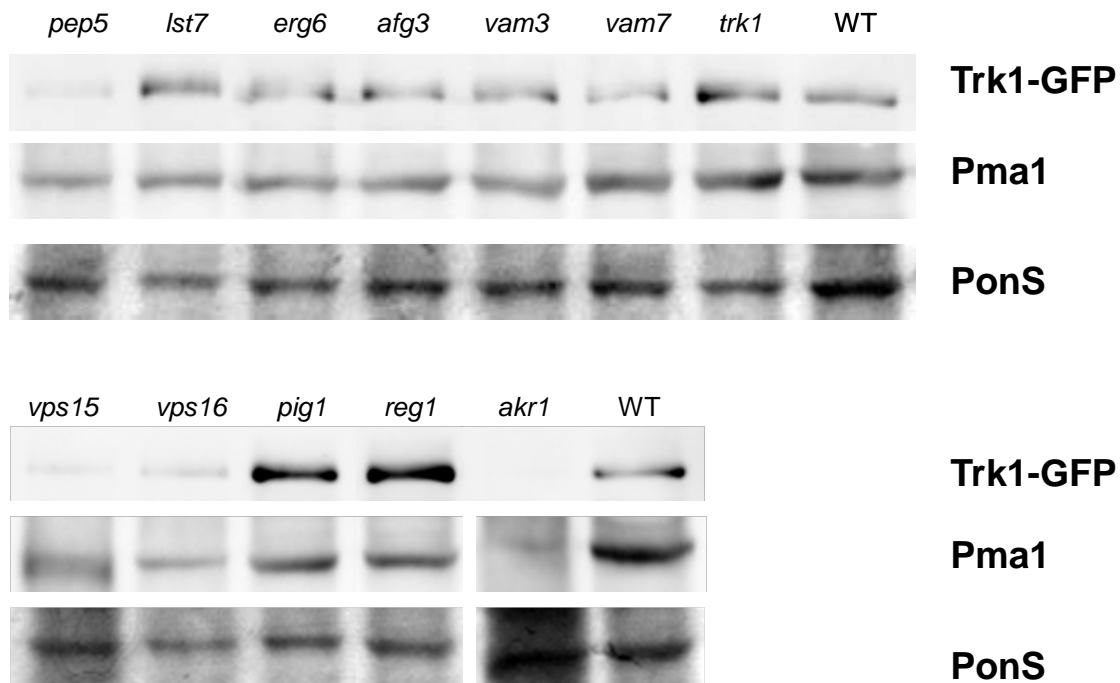

### B) Group B

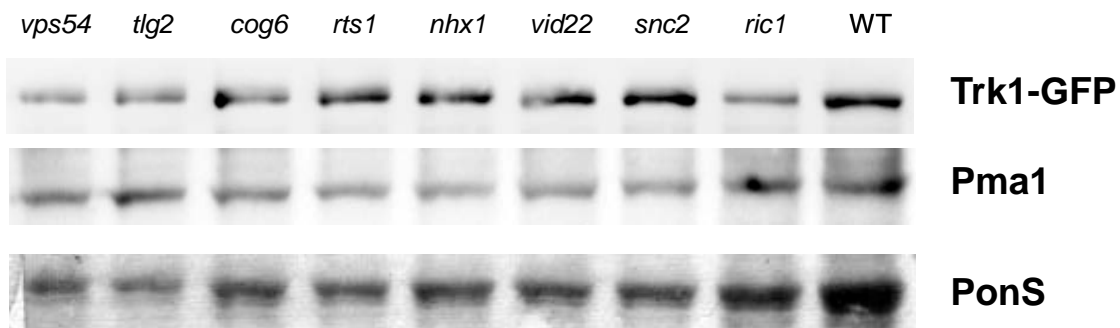

### C) Groups C and D

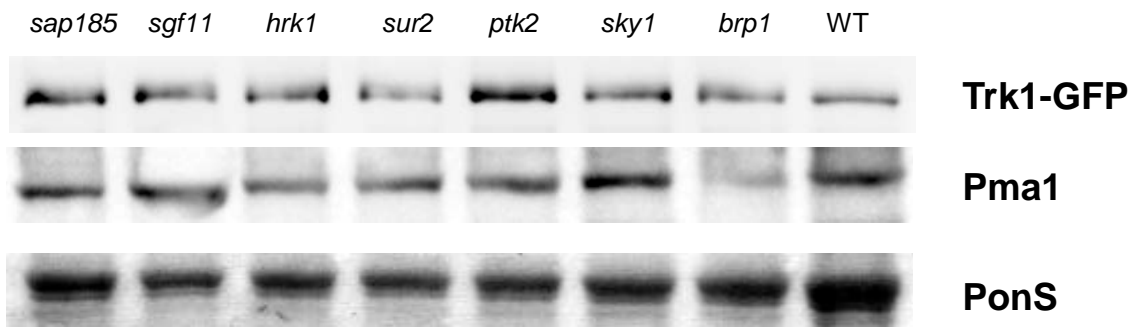

Supplemental Figure 1 (A-C)

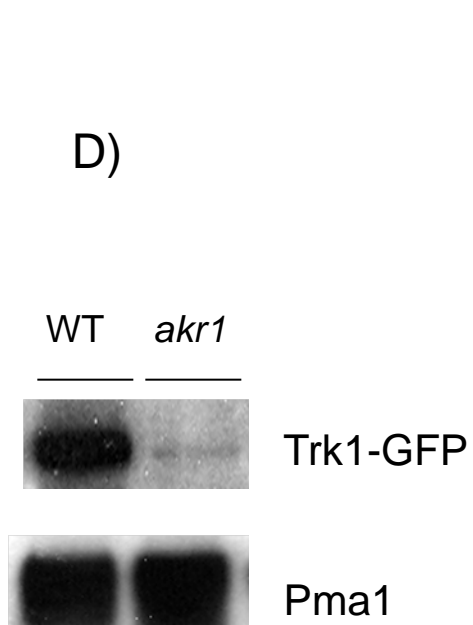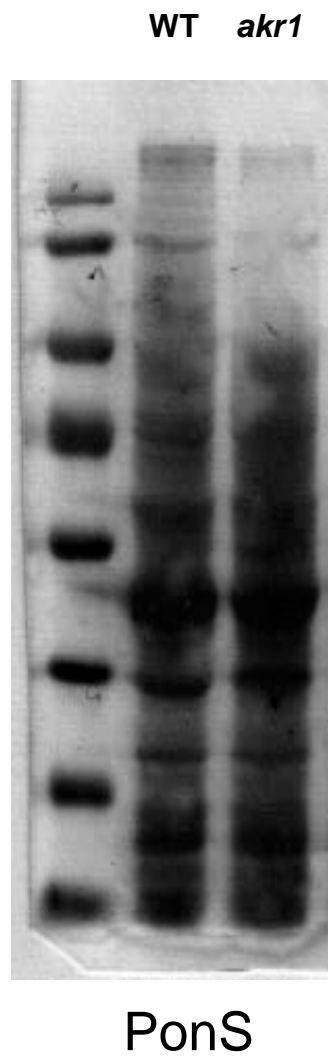

Supplemental Figure 1 (D)

Supplement: supp_10_9_1241__1.pdf [file supp_10_9_1241__1.pdf]
